# Supplementary material
Source: PubMed Central journal article supplement (PMC3078348)
Supplement: 1017975108_pnas.201017975SI.pdf [file 1017975108_pnas.201017975SI.pdf]

# Supporting Information

Gill et al. 10.1073/pnas.1017975108

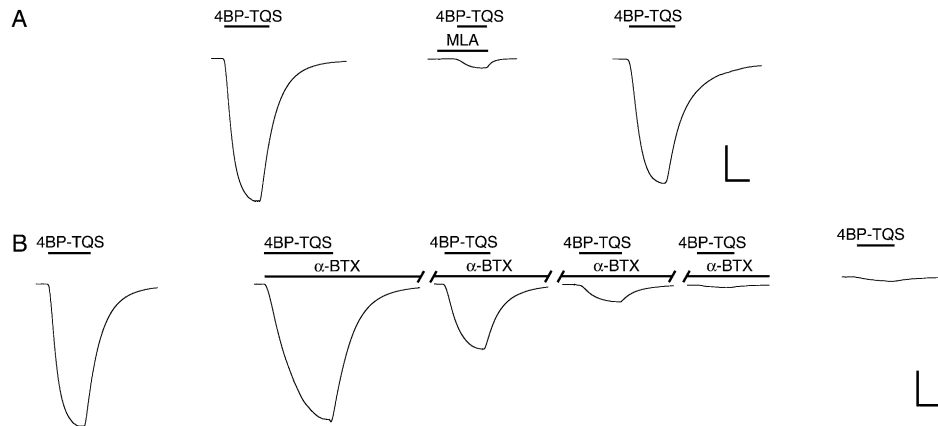

**Fig. S1.** Antagonism of 4BP-TQS responses by metyllycaconitine (MLA) and  $\alpha$ -bungarotoxin ( $\alpha$ -BTX) on  $\alpha$ 7 nicotinic acetylcholine receptors (nAChRs) expressed in *Xenopus* oocytes. (A) Responses to 4BP-TQS (10  $\mu$ M) (Left) were blocked by MLA (5 nM, MLA was preapplied for 15 s and also coapplied with 4BP-TQS) (Center). Responses to 4BP-TQS showed complete recovery after a 2-min wash (the shortest time point examined) (Right). (B) Responses to 4BP-TQS (10  $\mu$ M) (Left) were blocked by  $\alpha$ -BTX (10 nM) but the block was slow to develop (Center: traces were recorded 0, 2, 6, and 12 min after exposure to  $\alpha$ -BTX). Complete block was not observed until receptors had been exposed to  $\alpha$ -BTX for several minutes. Only minimal recovery from block by  $\alpha$ -BTX was observed, even after washing for 15 min (Right). (Scale bars: vertical, 0.5  $\mu$ A; horizontal, 20 s.)

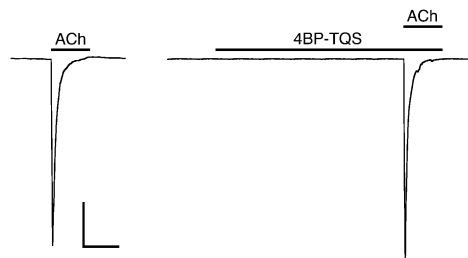

**Fig. S2.** Mutation M253L, located in the  $\alpha$ 7 nAChR M2 transmembrane domain, blocks both the allosteric agonist and the potentiating (PAM) activity of 4BP-TQS. A protocol similar to that described in Fig. 6 was used to examine  $\alpha$ 7 nAChRs containing the M253L mutation. Application of acetylcholine (3 mM) resulted in rapidly desensitizing responses typical of  $\alpha$ 7 nAChRs (Left). In contrast to the situation observed in wild-type  $\alpha$ 7 nAChRs (Fig. 6), no agonist activation was observed when 4BP-TQS (10  $\mu$ M) was applied to receptors containing the M253L mutation (Right). In addition, subsequent coapplication of acetylcholine (3 mM) with 4BP-TQS (10  $\mu$ M) gave no evidence of potentiation of the acetylcholine response. Similar data were obtained with lower (e.g.,  $EC_{10}$ ) concentrations of acetylcholine. (Scale bars: vertical, 100 nA; horizontal, 5 s.)
